# Supplementary material for: Functional Characterization of Selected Universal Stress Protein from Salvia miltiorrhiza (SmUSP) in Escherichia coli
Source: MDPI journal article supplement (doi:10.3390/genes8090224), 2017-09-08
Supplement: s1 [file s1]

**Table S1: Primers for qRT-PCR**

| Gene           | Primer name      | Sequence(5'-3')       |
|----------------|------------------|-----------------------|
| <i>SmUSP1</i>  | <i>SmUSP1-S</i>  | TTCCATAAGCAGCACTGGAG  |
|                | <i>SmUSP1-A</i>  | CAGGGACTTGAACGTGAAGA  |
| <i>SmUSP2</i>  | <i>SmUSP2-S</i>  | ATGGAGGAGGAGTACGACCA  |
|                | <i>SmUSP2-A</i>  | CCTTCACGATGTGGATCTTC  |
| <i>SmUSP3</i>  | <i>SmUSP3-S</i>  | CACAATCCAATCTGCAATCC  |
|                | <i>SmUSP3-A</i>  | CTTTGCTCGATGCTGCTTAG  |
| <i>SmUSP4</i>  | <i>SmUSP4-S</i>  | CTGTGAAGAAAGCGCAAGAG  |
|                | <i>SmUSP4-A</i>  | CAACATGCAGTTCCTCTGCT  |
| <i>SmUSP5</i>  | <i>SmUSP5-S</i>  | AGCAGAACTGGAGGACGAT   |
|                | <i>SmUSP5-A</i>  | AAGCACAGCCTCTCCTTCAT  |
| <i>SmUSP6</i>  | <i>SmUSP6-S</i>  | GCAGTGGACGAAAGTGAAGA  |
|                | <i>SmUSP6-A</i>  | AAGAAGGAATGGGTGGTTTG  |
| <i>SmUSP7</i>  | <i>SmUSP7-S</i>  | AGCTGCCTAAGGATTTGGAA  |
|                | <i>SmUSP7-A</i>  | CAGCCTCCTCTTCCGATAAG  |
| <i>SmUSP8</i>  | <i>SmUSP8-S</i>  | AAAGACCTGAGGTGCATGTG  |
|                | <i>SmUSP8-A</i>  | ATGATTGCTTTCGTTGTCCA  |
| <i>SmUSP9</i>  | <i>SmUSP9-S</i>  | CCCTGATCCAGAGGTTCTTG  |
|                | <i>SmUSP9-A</i>  | TCACACAATTTCTCCCTTGG  |
| <i>SmUSP10</i> | <i>SmUSP10-S</i> | ACATCATGATCGCTGTGGAT  |
|                | <i>SmUSP10-A</i> | TCAAACCTGGAGATGGCGTAG |
| <i>SmUSP11</i> | <i>SmUSP11-S</i> | GATAACAGCCCTCAAATGGG  |
|                | <i>SmUSP11-A</i> | CGGAGCTTCTTCTTGCTCTT  |
| <i>SmUSP12</i> | <i>SmUSP12-S</i> | CACCCACGTCACCTAACAAGG |
|                | <i>SmUSP12-A</i> | GACGTGGCAAGGTAGTGAGA  |
| <i>SmUSP13</i> | <i>SmUSP13-S</i> | CTGTGAAGAAAGCGCAAGAG  |
|                | <i>SmUSP13-A</i> | CAACATGCAGTTCCTCTGCT  |
| <i>SmUSP14</i> | <i>SmUSP14-S</i> | GGCAGTCGAAGAGATGAACA  |
|                | <i>SmUSP14-A</i> | TTTCTTGGATGGTTGCTTGA  |
| <i>SmUSP15</i> | <i>SmUSP15-S</i> | GTTGGGTCTCTGTGGGATCT  |
|                | <i>SmUSP15-A</i> | ACCGACGACTAGGACAGAGG  |
| <i>SmUSP16</i> | <i>SmUSP16-S</i> | TCGATACGTTCCACCACCACT |
|                | <i>SmUSP16-A</i> | GAGCCGCTCCTTCATATCAT  |
| <i>SmUSP17</i> | <i>SmUSP17-S</i> | CCTCTTCTCACCTTGCTTCC  |
|                | <i>SmUSP17-A</i> | ATCTTTGGTCCTTGAATGGC  |
| <i>SmUSP18</i> | <i>SmUSP18-S</i> | TGAGCGATTTCAAACTCC    |
|                | <i>SmUSP18-A</i> | ATGCAGTGGTGACGATGTCT  |
| <i>SmUSP19</i> | <i>SmUSP19-S</i> | TGGCTGATAAAGGCGATACA  |
|                | <i>SmUSP19-A</i> | ATCAGAGGAGAACCGGATTG  |
| <i>SmUSP20</i> | <i>SmUSP20-S</i> | AGGAGGGATCCAAAGGAAAT  |
|                | <i>SmUSP20-A</i> | GAGCCCACGGCTACCTATAA  |
| <i>SmUSP21</i> | <i>SmUSP21-S</i> | GTGGCGATAACAGCTCTCAA  |
|                | <i>SmUSP21-A</i> | CGGAGCTTCTTCTTGCTCTT  |

---

|                |                  |                        |
|----------------|------------------|------------------------|
| <i>SmUSP22</i> | <i>SmUSP22-S</i> | ATTTGGTTGGGACATGAGGT   |
|                | <i>SmUSP22-A</i> | AATCCGACAACTGTGGTTCA   |
| <i>SmUSP23</i> | <i>SmUSP23-S</i> | TCCAAGCTCGTCATCTTCAC   |
|                | <i>SmUSP23-A</i> | CTCCAACAAAGCTTCAGCAA   |
| <i>SmUSP24</i> | <i>SmUSP24-S</i> | GGTCAAGAAAAGGAGAGTTTCC |
|                | <i>SmUSP24-A</i> | TCTCCTCGCCTTCATCAA     |
| <i>SmUSP25</i> | <i>SmUSP25-S</i> | ATGGGAGAAAAGGGGAAGAA   |
|                | <i>SmUSP25-A</i> | AGCAAATTTTGGAGGCACC    |
| <i>SmUSP26</i> | <i>SmUSP26-S</i> | CGGTTCTCCTCTGATTCCAT   |
|                | <i>SmUSP26-A</i> | CTTTCTGCCTAGCTGCAGTG   |
| <i>SmUSP27</i> | <i>SmUSP27-S</i> | AAGCTTTGAAGTGGGCTGTT   |
|                | <i>SmUSP27-A</i> | GAACTCGCTCAATGGAATCA   |
| <i>SmUSP28</i> | <i>SmUSP28-S</i> | TGGTGGTTCTGCTCTATGTCA  |
|                | <i>SmUSP28-A</i> | CTTCCACCACCTCAACCTCT   |
| <i>SmUSP29</i> | <i>SmUSP29-S</i> | TCATTCAAAGGACTGGCAGA   |
|                | <i>SmUSP29-A</i> | TCCTCCGTTAGCCTTTCTCT   |
| <i>SmUSP30</i> | <i>SmUSP30-S</i> | CCGGAAGTCAAAGGAGGTAG   |
|                | <i>SmUSP30-A</i> | CGAGCCCTAATTCAGTCGT    |
| <i>SmUSP31</i> | <i>SmUSP31-S</i> | GGCAGTCGAAGAGATGAACA   |
|                | <i>SmUSP31-A</i> | TGAGCACAGTATCGCTCACA   |
| <i>SmUSP32</i> | <i>SmUSP32-S</i> | TGAGCGATTTCACAAACTCC   |
|                | <i>SmUSP32-A</i> | ATGCAGTGGTGACGATGTCT   |

---
