# Supplementary material for: Functional Characterization of Selected Universal Stress Protein from Salvia miltiorrhiza (SmUSP) in Escherichia coli
Source: MDPI journal article supplement (doi:10.3390/genes8090224), 2017-09-08
Supplement: s1 [file s1]

**Table S4: Promoter sequences analysis of 32 SmUSP**

| Gene    | ABRE | HSE | MBS |
|---------|------|-----|-----|
| SmUSP1  | 3    | 0   | 1   |
| SmUSP2  | 7    | 2   | 3   |
| SmUSP3  | 3    | 2   | 1   |
| SmUSP4  | 3    | 1   | 0   |
| SmUSP5  | 0    | 3   | 1   |
| SmUSP6  | 0    | 1   | 0   |
| SmUSP7  | 0    | 1   | 2   |
| SmUSP8  | 0    | 0   | 0   |
| SmUSP9  | 0    | 1   | 1   |
| SmUSP10 | 0    | 0   | 0   |
| SmUSP11 | 3    | 2   | 3   |
| SmUSP12 | 1    | 1   | 1   |
| SmUSP13 | 3    | 1   | 1   |
| SmUSP14 | 2    | 0   | 1   |
| SmUSP15 | 0    | 0   | 0   |
| SmUSP16 | 6    | 4   | 2   |
| SmUSP17 | 0    | 2   | 1   |
| SmUSP18 | 0    | 2   | 0   |
| SmUSP19 | 3    | 1   | 1   |
| SmUSP20 | 3    | 0   | 8   |
| SmUSP21 | 3    | 0   | 2   |
| SmUSP22 | 1    | 1   | 1   |
| SmUSP23 | 4    | 0   | 0   |
| SmUSP24 | 0    | 1   | 2   |
| SmUSP25 | 0    | 0   | 0   |
| SmUSP26 | 0    | 1   | 5   |
| SmUSP27 | 0    | 0   | 1   |
| SmUSP28 | 0    | 3   | 0   |
| SmUSP29 | 2    | 1   | 1   |
| SmUSP30 | 2    | 2   | 3   |
| SmUSP31 | 1    | 0   | 0   |
| SmUSP32 | 1    | 0   | 2   |

\*Promoter sequences of *SmUSP15*, *SmUSP25*, *SmUSP8* contain 3,1,1 TC-rich repeats elements involved in defense and stress responsiveness respectively; *SmUSP25* contains 2 LTR elements involved in low-temperature responsiveness and *SmUSP11*, *SmUSP21* contains 1 circadian element involved in circadian control respectively.
