# Supplementary material for: Functional Characterization of Selected Universal Stress Protein from Salvia miltiorrhiza (SmUSP) in Escherichia coli
Source: MDPI journal article supplement (doi:10.3390/genes8090224), 2017-09-08
Supplement: s1 [file s1]

**Table S3: The characteristics of the 32 SmUSP proteins**

| Gene    | Gene length<br>(bp) | CDs length<br>(bp) | Protein(aa) | Mw (Da)  | PI    | Subcellular location |
|---------|---------------------|--------------------|-------------|----------|-------|----------------------|
| SmUSP1  | 1882                | 669                | 222         | 24705.22 | 6.81  | other                |
| SmUSP2  | 750                 | 750                | 249         | 26513.96 | 10.69 | chloroplast          |
| SmUSP3  | 3583                | 2274               | 757         | 83958.85 | 6.08  | other                |
| SmUSP4  | 1067                | 579                | 192         | 20958.36 | 6.08  | other                |
| SmUSP5  | 5478                | 1749               | 582         | 64848.89 | 5.49  | chloroplast          |
| SmUSP6  | 759                 | 501                | 166         | 18356.15 | 6.81  | other                |
| SmUSP7  | 3199                | 2265               | 754         | 83109.59 | 5.20  | other                |
| SmUSP8  | 963                 | 714                | 237         | 27260.38 | 10.20 | mitochondrion        |
| SmUSP9  | 897                 | 492                | 163         | 17683.62 | 9.27  | other                |
| SmUSP10 | 1516                | 546                | 181         | 20173.33 | 5.78  | other                |
| SmUSP11 | 362                 | 279                | 92          | 10361.16 | 9.30  | secretory pathway    |
| SmUSP12 | 1294                | 720                | 239         | 26430.74 | 9.14  | other                |
| SmUSP13 | 1067                | 579                | 129         | 20958.36 | 6.08  | other                |
| SmUSP14 | 1997                | 489                | 162         | 17546.36 | 9.16  | other                |
| SmUSP15 | 954                 | 306                | 101         | 10740.33 | 7.76  | mitochondrion        |
| SmUSP16 | 711                 | 711                | 236         | 25679.81 | 4.87  | chloroplast          |
| SmUSP17 | 969                 | 597                | 198         | 21795.30 | 9.36  | other                |
| SmUSP18 | 1161                | 486                | 161         | 17723.45 | 6.72  | other                |
| SmUSP19 | 841                 | 483                | 160         | 18005.87 | 6.29  | other                |
| SmUSP20 | 856                 | 399                | 132         | 14830.45 | 9.73  | chloroplast          |
| SmUSP21 | 1677                | 477                | 158         | 17648.63 | 9.61  | secretory pathway    |
| SmUSP22 | 3469                | 2091               | 696         | 76039.63 | 6.00  | other                |
| SmUSP23 | 1041                | 492                | 163         | 18121.86 | 7.07  | other                |
| SmUSP24 | 1124                | 540                | 179         | 19555.58 | 8.58  | other                |
| SmUSP25 | 958                 | 483                | 160         | 17442.09 | 6.18  | other                |
| SmUSP26 | 614                 | 408                | 135         | 15323.64 | 6.14  | other                |
| SmUSP27 | 1388                | 594                | 197         | 21771.16 | 6.33  | mitochondrion        |
| SmUSP28 | 819                 | 654                | 217         | 23668.86 | 9.93  | mitochondrion        |
| SmUSP29 | 830                 | 531                | 176         | 17813.38 | 9.89  | chloroplast          |
| SmUSP30 | 2263                | 1134               | 377         | 40372.12 | 11.16 | other                |
| SmUSP31 | 1709                | 249                | 82          | 9019.26  | 8.01  | other                |
| SmUSP32 | 2021                | 627                | 208         | 23136.63 | 8.27  | other                |
