# Supplementary material for: Functional Characterization of Selected Universal Stress Protein from Salvia miltiorrhiza (SmUSP) in Escherichia coli
Source: MDPI journal article supplement (doi:10.3390/genes8090224), 2017-09-08
Supplement: s1 [file s1]

**Table S2: Primers for cloning the full-length of 3 *SmUSPs***

| Gene           | Primer name      | Sequence(5'-3')                                 |
|----------------|------------------|-------------------------------------------------|
| <i>SmUSP1</i>  | <i>SmUSP1-F</i>  | <b>GCC<u>GAGCTC</u></b> ATGGCAGCAGCGGAGG        |
|                | <i>SmUSP1-R</i>  | <b>CCG<u>CTCGAG</u></b> TCAGTCATCAACAGGATCCTGA  |
| <i>SmUSP8</i>  | <i>SmUSP8-F</i>  | <b>CGC<u>GGATCC</u></b> ATGCCTGGTTTCTGCATGAGT   |
|                | <i>SmUSP8-R</i>  | <b>CCCA<u>AGCTT</u></b> CTAGGCCAGAAGCCAAAAGTT   |
| <i>SmUSP27</i> | <i>SmUSP27-F</i> | <b>CGC<u>GGATCC</u></b> ATGGCAGATTGCAGAAGAGT    |
|                | <i>SmUSP27-R</i> | <b>CCG<u>CTCGAG</u></b> CTAGTCGTGGCTCTTCACTACAG |
