# Supplementary figures and images for: Functional Characterization of Selected Universal Stress Protein from Salvia miltiorrhiza (SmUSP) in Escherichia coli
Source: MDPI journal article supplement (doi:10.3390/genes8090224), 2017-09-08

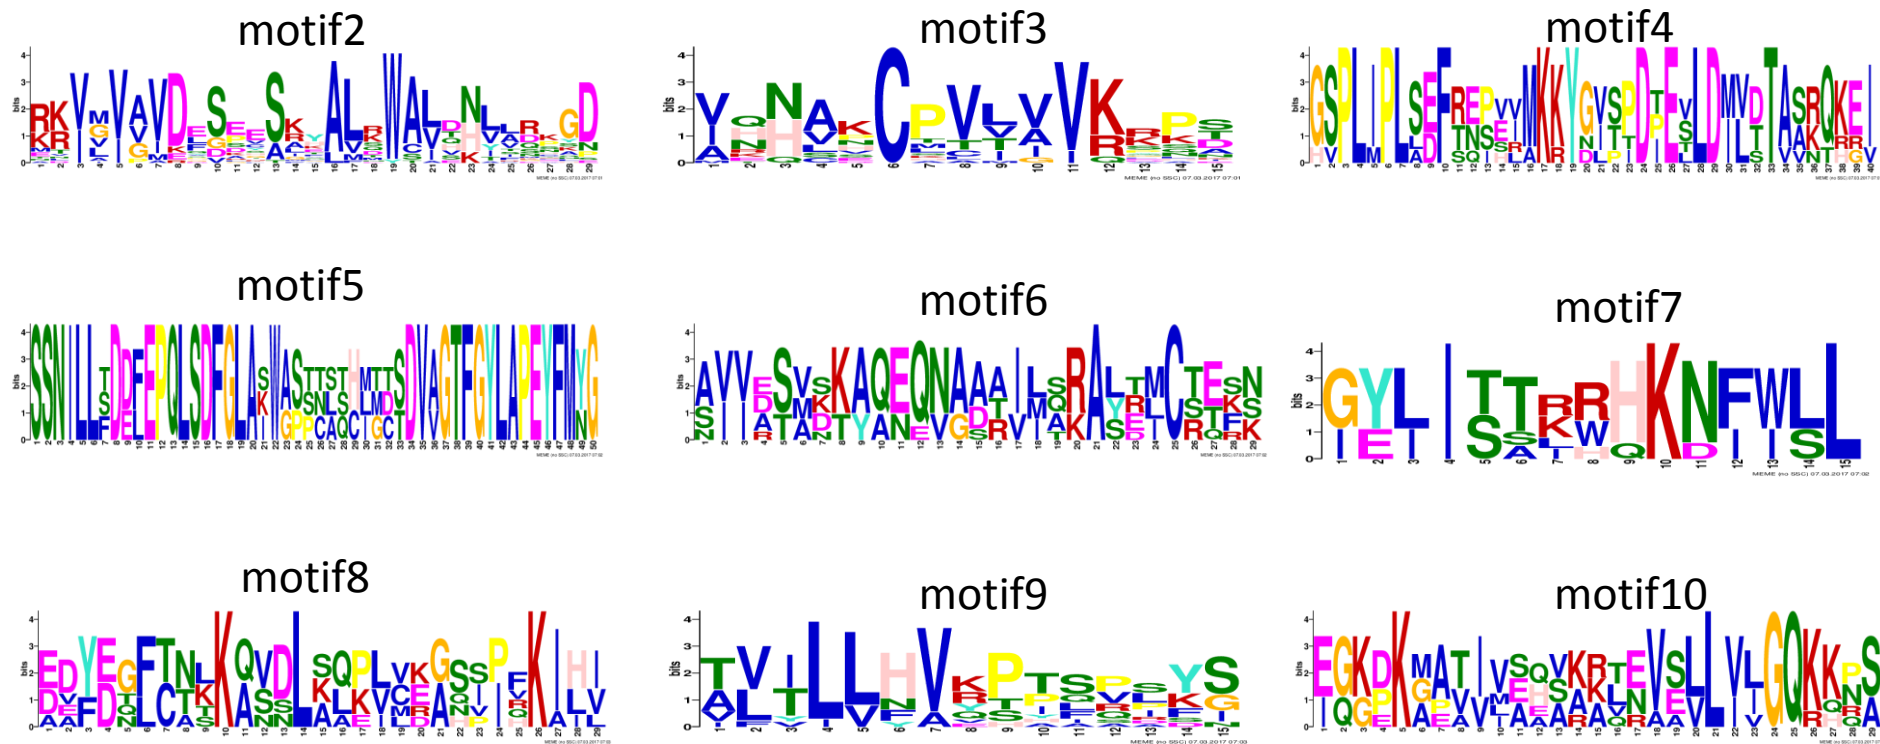

Figure S1: Motif 2-10 of SmUSP proteins

Supplement: s1 [file s1]
